# Supplementary material
Source: PubMed Central journal article supplement (PMC4912016)
Supplement: NIHMS790219-supplement-supplement_1.pdf [file NIHMS790219-supplement-supplement_1.pdf]

**Figure 3. Positive ion MALDI-IMS of DAG lipids in GSC xenografts.** (A) Relative abundance of DAG (34:0), DAG (34:1), DAG (36:1), DAG (38:4), DAG (38:6), and DAG (40:6) as determined by ESI-MS/MS. Values are mean  $\pm$  SEM ( $n = 9$  for each phenotype) of the lipid abundance as the ratio of lipid peak area to the peak area of an internal standard corrected for protein concentration; \*  $p < 0.05$  and \*\*  $p < 0.01$  (Student's  $t$ -test). (B) Positive ion image from MALDI-IMS experiments of a representative attractor specimen, demonstrating the localization and signal intensity of DAG (40:6) ( $m/z$  707.1). Image color intensity corresponds to signal strength. (C) H&E staining of corresponding tissue section analyzed by MALDI-IMS. The tumor area is outlined in *blue*. (D) Positive ion image of DAG (40:6),  $m/z$  707.1 from MALDI-IMS experiments of a representative non-attractor specimen. (E) H&E staining of a corresponding tissue section analyzed by MALDI-IMS. The tumor area is outlined in *blue*.

**Figure 4. Tumor-specific localization of DHA.** (A and C) Negative ion images derived from MALDI-IMS experiments showing the localization and signal intensity of DHA (22:6)  $m/z$  327.0 in a representative non-attractor and attractor, respectively. (B and D) H&E stain of tissue sections used in MALDI-IMS experiments in a non-attractor and attractor, respectively. The tumor area is outlined in *blue*. (E) Relative abundance of DHA as determined by ESI-MS/MS ( $p = 0.046$ ). (F) Annotated negative ion MS/MS spectrum of  $m/z$  327.0 with precursor ion (*inset*). The most abundant peak, DHB  $[M-H]^-$ , represents the matrix. MS/MS product ions are shown in

**Table 1.**

**Supplemental Figure S1.** Annotated MS/MS spectrum of DHA (22:6) standard for comparison to tissue-acquired DHA in **Figure 4F**.

**Supplemental Figure S2.** Annotated MS/MS spectrum of DAG (40:6) suggesting DHA-containing DAG (22:6/18:0). Precursor ion of potassiated DAG (40:6)  $m/z$  707.1 is shown (*inset*). Peak at  $m/z$  191.9 is DHB matrix ion and the peak at 323.6 represents potassiated 18:0 FA  $[FA+K^+]^+$
